# Supplementary material for: A new method for rapid detection and identification of fish parasites through whole-fish homogenization
Source: Research Square preprint supplement (doi:10.21203/rs.3.rs-6205506/v1), 2025-03-12
Supplement: Supplementary file 1 [file a227cc0cb137dc58da8b5199.docx]

**Supplementary file S1 – PCR conditions**

For *Anguillicola crassus*: 5 μl of Accustart II Supermix (2x) (QuantaBio), 1 μl of each primer (2 μM), 2 μl of PCR-grade water and 1 μl of DNA extract. The PCR conditions were as follows: initial denaturation at 95°C for 5 min followed by 40 cycles of denaturation at 95°C for 30 s, annealing at 65°C for 90 s and extension at 72°C for 30 s with a final elongation at 68°C for 10 min.

For *Pseudodactylogyrus* sp.: 10 μl of DreamTaq Master Mix (2x) (Thermo Fisher), 1 μl of each primer (2 μM), 6 μl of PCR-grade water and 2 μl of DNA extract. The PCR conditions were as follows: initial denaturation at 95°C for 3 min followed by 40 cycles of denaturation at 95°C for 30 s, annealing at 52°C for 90 s and extension at 72°C for 120 s with a final elongation at 72°C for 10 min.

For *Pomphorynchus* sp.: 10 μl of DreamTaq Master Mix (2x) (Thermo Fisher), 1 μl of each primer (2 μM), 6 μl of PCR-grade water and 2 μl of DNA extract. The PCR conditions were as follows: initial denaturation at 95°C for 5 min followed by 35 cycles of denaturation at 95°C for 30 s, annealing at 58°C for 90 s and extension at 72°C for 30 s with a final elongation at 72°C for 10 min.

For *Bothriocephalus* sp.: 10 μl of DreamTaq Master Mix (2x) (Thermo Fisher), 1 μl of each primer (2 μM), 6 μl of PCR-grade water and 2 μl of DNA extract. The PCR conditions were as follows: initial denaturation at 95°C for 3 min followed by 35 cycles of denaturation at 95°C for 30 s, annealing at 60°C for 90 s and extension at 72°C for 60 s with a final elongation at 72°C for 10 min.

For *Proteocephalus* sp.: 10 μl of DreamTaq Master Mix (2x) (Thermo Fisher), 1 μl of each primer (2 μM), 6 μl of PCR-grade water and 2 μl of DNA extract. The PCR conditions were as follows: initial denaturation at 95°C for 3 min followed by 35 cycles of denaturation at 95°C for 30 s, annealing at 56°C for 90 s and extension at 72°C for 120 s with a final elongation at 72°C for 10 min.
